# Supplementary material for: Heparin-binding protein and procalcitonin in the diagnosis of pathogens causing community-acquired pneumonia in adult patients: a retrospective study
Source: PeerJ. 2021 Mar 12;9:e11056. doi: 10.7717/peerj.11056 (PMC7958890; doi:10.7717/peerj.11056)
Supplement: Data S1 [file peerj-09-11056-s001.xlsx]

## Sheet: Sheet1
Patient number	gender	age/year	Connective tissue disease	HBV/HCV/HIV	tuberculosis	Corticosteroid	sample	Pathogen	Outcome	Discharge diagnosis	Admission date	Discharge date	GROUP	HBP(ng/mL)	CRP(mg/L)	PCT(ng/mL)	Leukocyte(*109/L)	Neutrophils(%)	Monocyte(%)	Lymphocyte(%)	Neutrophils(*109/L)	Monocyte(*109/L)	Lymphocyte(*109/L)	ALT(U/L)	TB(μmol/L)	BUN(mmol/L)	Cr(μmol/L)	PaO2	FiO2	PaO2/FiO2	CURB-65 of admission	CT-score of admission
1	male	93	no	no	no	no	sputum	Gram-positive cocci	better	CAP Parkinson's Disease Coronary Heart Disease ,Type 2 diabetes, Cerebral infarction,	2018-09-19	2018-09-22	1	200	55	8.9	23.77	89.6	6.1	3.9	21.3	1.45	0.93	58.9	10.9	13.1	122.9	73	0.24	304.17	2	3
2	male	62	no	no	no	no	sputum	Gram-positive cocci	better	CAP ,High blood pressure,Coronary Heart Disease	2018-12-22	2018-12-30	1	47.75	76.6	1.9	20.22	86.7	7.8	5.3	17.53	1.58	1.07	28.8	4.8	5.2	58.8	81	0.24	337.5	0	5
3	male	79	no	no	no	no	sputum	Klebsiella pneumoniae	better	CAP ，Cerebral infarction, ,High blood pressure，Type 2 diabetes,	2019-01-10	2019-01-29	1	22.55	79.5	1	19.95	94	2.5	3.5	18.75	0.5	0.7	6.7	12.7	13.3	79.7	90	0.24	375	2	7
4	male	57	no	no	no	no	sputum	Gram-positive cocci	better	CAP ,Type 2 diabetes,	2019-02-13	2019-02-20	1	14.64	49.7	1.35	19.76	95.8	1.3	2.9	18.93	0.26	0.57	16.3	11.3	12.7	56.3	85	0.21	404.76	1	5
5	male	56	no	no	no	no	sputum	Pseudomonas aeruginosa	better	CAP ，Nephrotic syndrome, ,High blood pressure,	2019-01-02	2019-01-17	1	55.2	8.11	2.5	19.44	88.4	2.1	8.5	17.18	0.41	1.65	34.4	12.4	13.6	44.4	93	0.21	442.86	1	5
6	male	84	no	no	no	no	sputum	Gram-positive cocci	better	CAP ,Cerebral infarction, Coronary Heart Disease	2018-12-15	2018-12-19	1	32.58	161	3.35	19.32	90.8	5.7	3.2	17.54	1.1	0.62	60	2	10	105	75	0.24	312.5	2	2
7	male	84	no	no	no	no	sputum	Klebsiella pneumoniae	better	CAP AECOPD Coronary Heart Disease ，Atrial fibrillation, ，Connective tissue disease,	2018-12-19	2019-01-03	1	20.2	72.5	1.19	18.67	82.6	5.2	8.9	15.42	0.97	1.66	40	3	5	61	87	0.24	362.5	1	4
8	male	57	no	no	no	no	sputum	Klebsiella pneumoniae	better	CAP	2018-08-04	2018-08-20	1	89.24	135	1.75	18.55	90.1	8.4	1.5	16.71	1.56	0.28	51.3	17.3	10.7	159.2	86	0.21	409.52	1	5
9	male	38	no	no	no	no	sputum	Pseudomonas aeruginosa	better	CAP ,High blood pressure,	2018-08-16	2018-08-26	1	63.93	194	1.89	18.07	79.5	9.8	10.5	14.37	1.77	1.9	11.8	25.3	8.6	144.8	84	0.21	400	1	4
10	male	88	no	no	no	no	sputum	Pseudomonas aeruginosa	better	CAP ,Type 2 diabetes, High blood pressure，Cerebral infarction,	2018-10-11	2018-10-24	1	48.13	69.1	1.6	18.07	71.6	4	22	12.94	0.72	3.98	7	3	5	52	76	0.24	316.67	1	5
11	male	80	no	no	no	no	sputum	Klebsiella pneumoniae	better	CAP Coronary Heart Disease ,Type 2 diabetes,	2018-07-20	2018-08-07	1	54.79	9.37	3.5	17.96	90.3	5.7	3.8	16.22	1.02	0.68	24.9	2	17	96.8	75	0.24	312.5	2	2
12	female	77	no	no	no	no	sputum	Gram-positive cocci	better	CAP	2018-08-07	2018-08-11	1	106.49	127	14.49	17.9	86.7	6.1	6.7	15.52	1.09	1.2	43	17	11	94	83	0.24	345.83	2	5
13	male	84	no	no	no	no	sputum	Staphylococcus aureus	better	CAP Coronary Heart Disease ，Heart failure,	2018-12-15	2018-12-16	1	57.44	90.6	1.07	17.12	92.9	4.3	2.5	15.9	0.74	0.43	27.6	19.6	6.8	161.6	77	0.24	320.83	1	4
14	male	63	no	no	no	no	sputum	Gram-positive cocci	better	CAP Coronary Heart Disease ,High blood pressure，Cerebral infarction, Kidney stones,	2019-03-06	2019-04-01	1	101.5	134	2.13	16.51	81.8	6.7	11.1	13.51	1.11	1.83	38.9	22.9	7.7	87.9	95	0.24	395.83	1	4
15	male	66	no	no	no	no	sputum	Gram-negative bacilli	better	CAP	2018-12-04	2018-12-18	1	45.94	167	1.15	15.9	87.3	5.8	6.5	13.88	0.92	1.03	6.9	7.9	8.1	68.9	76	0.24	316.67	2	1
16	female	94	no	no	no	no	sputum	Gram-positive cocci	better	CAP ,High blood pressure,Cerebral infarction,	2019-02-18	2019-02-26	1	65.1	82	0.8	15.75	80.1	2.1	9.8	12.62	0.33	1.54	14.5	14.5	15.5	75.5	65	0.24	270.83	2	4
17	male	25	no	no	no	no	sputum	Gram-positive cocci	better	CAP	2018-09-12	2018-09-18	1	35.08	23.2	1	15.7	67.2	2.6	20.5	10.55	0.41	3.22	98.3	8.3	9.7	63.3	74	0.21	352.38	1	3
18	male	77	no	no	no	no	sputum	Klebsiella pneumoniae	better	CAP COPD Coronary Heart Disease	2018-07-29	2018-08-19	1	112.86	336	3.21	15.67	92.1	6.8	1	14.43	1.07	0.16	33	11	10	151	73	0.24	304.17	2	1
19	male	37	no	no	no	no	sputum	Gram-negative bacilli	better	CAP ,High blood pressure,	2019-02-19	2019-03-12	1	117.28	252	5.7	15.64	82	5.8	11.8	12.82	0.91	1.85	17.1	7.1	8.9	94.1	85	0.21	404.76	1	4
20	male	50	no	no	no	no	sputum	Gram-positive cocci	better	CAP	2018-08-04	2018-08-21	1	35.29	212	3.4	15.56	84.5	10	5.3	13.15	1.56	0.82	22	15	16	66.4	86	0.21	409.52	1	1
21	male	89	no	no	no	no	sputum	Enterobacter cloacae	better	CAP ，Cerebral infarction, ,High blood pressure,	2018-10-11	2018-10-31	1	147.88	47.2	0.8	15.53	87.3	4.9	4.9	13.56	0.76	0.76	20.6	3.6	4.4	61.6	73	0.24	304.17	1	3
22	female	88	no	no	no	no	sputum	Gram-positive cocci	better	CAP COPD Coronary Heart Disease ,Type 2 diabetes, High blood pressure,	2019-02-12	2019-02-22	1	63.57	19.2	0.3	15.28	82.5	7.7	8	12.61	1.18	1.22	21.2	8.2	9.8	126.2	78	0.24	325	2	5
23	male	85	no	no	no	no	sputum	Pseudomonas aeruginosa	better	CAP ，Cerebral infarction, ，Parkinson's Disease,	2018-09-12	2018-09-21	1	137.4	242	2	14.83	91.6	5.6	2.4	13.58	0.83	0.36	12.7	7.7	8.3	66.7	70	0.24	291.67	2	1
24	male	94	no	no	no	no	sputum	Gram-positive cocci	better	CAP Coronary Heart Disease ,High blood pressure,	2018-12-25	2019-01-08	1	57.93	141	3.14	14.28	94.9	2.9	1.9	13.55	0.41	0.27	12.4	6.4	7.6	56.4	74	0.24	308.33	2	5
25	male	77	no	no	no	no	sputum	Gram-negative bacilli	better	CAP COPD ,High blood pressure,	2018-12-28	2019-01-12	1	120.13	80.5	0.3	13.79	91.6	4.7	3.5	12.63	0.65	0.48	22.8	3.8	4.2	121.8	64	0.24	266.67	1	4
26	male	85	no	no	no	no	sputum	Staphylococcus aureus	better	CAP COPD Coronary Heart Disease ,High blood pressure,	2018-07-31	2018-08-15	1	57.13	167	1.7	13.53	90	4.7	4.2	12.18	0.64	0.57	24.7	3.7	13.3	76.7	66	0.24	275	2	1
27	male	87	no	no	no	no	sputum	Gram-positive cocci	better	CAP	2018-08-08	2018-08-18	1	77.96	4.06	0.5	13.43	72.9	2.1	23.2	9.79	0.28	3.12	20.8	10.5	10.9	90.8	79	0.24	329.17	2	1
28	male	60	no	no	no	no	sputum	Gram-negative bacilli	better	CAP Coronary Heart Disease	2018-12-21	2018-12-25	1	70.02	49.9	0.2	12.68	92.5	2.4	4.8	11.73	0.3	0.61	22.6	12.6	13.4	70.6	75	0.24	312.5	1	2
29	female	83	no	no	no	no	sputum	Gram-positive cocci	better	CAP ,Cerebral infarction, Sequelae of cerebral hemorrhage, ,High blood pressure,	2019-03-04	2019-03-08	1	42.24	78.5	2.58	12.52	90.4	6.5	3.1	11.32	0.81	0.39	10	4	4	52	87	0.24	362.5	1	3
30	female	88	no	no	no	no	sputum	Acinetobacter baumannii	dead	CAP Coronary Heart Disease	2018-06-06	2018-08-17	1	46.75	19.6	0.4	12.41	67.7	9	21.1	8.4	1.12	2.62	10.2	3.4	5	36	78	0.24	325	1	4
31	male	84	no	no	no	no	sputum	Gram-negative bacilli	better	CAP	2018-08-06	2018-08-27	1	140.07	69.4	1	12.09	84.1	5.5	10.3	10.17	0.66	1.25	35.9	7.2	7.4	79.9	81	0.24	337.5	2	5
32	female	76	no	no	no	no	sputum	Streptococcus pneumoniae	better	CAP COPD	2019-01-15	2019-01-27	1	57.41	77.3	3.3	11.99	86.8	4.3	8.7	10.41	0.52	1.04	6.3	4.3	5.7	42.3	68	0.24	283.33	1	5
33	male	76	no	no	no	no	sputum	Gram-positive cocci	better	CAP Coronary Heart Disease ,High blood pressure，Cerebral infarction,	2018-09-20	2018-09-28	1	123.88	115	2.89	11.64	92.3	3.4	4.3	10.74	0.4	0.5	6.9	24.9	8.4	63.9	78	0.24	325	2	1
34	female	79	no	no	no	no	sputum	Acinetobacter baumannii	better	CAP Coronary Heart Disease	2018-10-06	2018-10-31	1	52.89	23	0.2	11.64	63.3	12	20.8	7.37	1.4	2.42	13	4	6	22	70	0.24	291.67	1	2
35	female	83	no	no	no	no	sputum	Gram-negative bacilli	better	CAP Coronary Heart Disease ,Type 2 diabetes, Cerebral infarction,	2018-09-11	2018-09-21	1	63.23	108	0.75	11.59	89.7	6.6	3.4	10.4	0.76	0.39	15.3	2	7	115	72	0.24	300	2	2
36	female	47	no	no	no	no	sputum	Gram-positive cocci	better	CAP	2019-01-09	2019-01-19	1	112.56	89.7	1	11.47	58.4	16.7	23.7	6.7	1.92	2.72	14	10	12	53	91	0.21	433.33	1	3
37	male	72	no	no	no	no	sputum	Gram-positive cocci	better	CAP COPD ,Type 2 diabetes, High blood pressure,	2019-03-05	2019-03-13	1	47.89	90.8	1.4	11.1	81.2	7.7	10.2	9.01	0.85	1.13	34.5	7.5	8.5	62.5	81	0.24	337.5	2	5
38	male	47	no	no	no	no	sputum	Klebsiella pneumoniae	better	CAP	2018-08-06	2018-09-12	1	40.84	64.8	1	11.1	69.2	12.4	14.3	7.68	1.38	1.59	17.5	21.8	7.3	63.9	88	0.21	419.05	1	3
39	male	79	no	no	no	no	sputum	Acinetobacter baumannii	better	CAP COPD ,High blood pressure，Type 2 diabetes,	2018-10-06	2018-10-24	1	169.91	2.56	1.1	11	96.2	1.7	2	10.58	0.19	0.22	31.3	0.3	1.7	82.3	75	0.24	312.5	1	2
40	male	79	no	no	no	no	sputum	Gram-positive cocci	better	CAP ,High blood pressure，Type 2 diabetes, Coronary Heart Disease	2019-02-18	2019-02-25	1	21.26	63.3	1.1	10.68	67.9	11.3	20	7.25	1.21	2.14	13.3	30.3	10.6	66.3	66	0.24	275	2	1
41	male	34	no	no	no	no	sputum	Gram-positive cocci	better	CAP	2019-01-22	2019-01-29	1	57.62	64.3	1.4	10.61	78.6	10.5	9.8	8.34	1.11	1.04	48.2	4.2	5.8	65.2	88	0.21	419.05	0	3
42	male	58	no	no	no	no	sputum	Gram-positive cocci	better	CAP ,High blood pressure，Type 2 diabetes,	2019-02-27	2019-03-07	1	48.73	77.6	0.4	10.59	77.5	7.9	13.8	8.21	0.84	1.46	16.1	7.1	8.9	69.1	89	0.21	423.81	1	1
43	female	53	no	no	no	no	sputum	Gram-positive cocci	better	CAP ,High blood pressure,	2019-02-11	2019-02-19	1	37.12	73.8	1.2	10.59	75.6	5.2	16	8.01	0.55	1.69	16.5	6.5	7.5	74.5	95	0.21	452.38	1	5
44	male	79	no	no	no	no	sputum	Gram-negative bacilli	better	CAP ,High blood pressure,Coronary Heart Disease	2018-12-25	2019-01-03	1	9.33	74.4	6.43	10.55	75.5	8.6	12.5	7.97	0.91	1.32	19.7	3.7	4.3	119.7	81	0.24	337.5	1	1
45	male	84	no	no	no	no	sputum	Proteus mirabilis	better	CAP Coronary Heart Disease	2018-09-11	2018-09-28	1	89.58	122	1.4	10.12	86.4	3.9	9.3	8.74	0.39	0.94	19.5	8.5	9.5	65.5	60	0.24	250	2	5
46	female	66	no	no	no	no	sputum	Gram-positive cocci	better	CAP ,High blood pressure，Cerebral infarction,	2018-12-26	2019-01-07	1	38.91	14.6	5.4	10.12	87.9	3.5	8.4	8.9	0.35	0.85	45.6	7.6	8.4	161.6	73	0.24	304.17	2	4
47	male	80	no	no	no	no	sputum	Klebsiella pneumoniae	better	CAP ,Type 2 diabetes,	2018-07-31	2018-08-15	1	36.47	153	2.3	10.09	81.6	3.4	9.4	8.23	0.34	0.95	39	17	14	144.2	64	0.24	266.67	2	4
48	male	55	no	no	no	no	sputum	Gram-positive cocci	better	CAP ,High blood pressure,	2019-02-13	2019-02-27	1	19.39	96.6	0.5	9.97	71.5	4.9	21.9	7.13	0.49	2.18	80.8	4.8	5.2	51.8	87	0.21	414.29	0	1
49	male	70	no	no	no	no	sputum	Gram-positive cocci	better	CAP COPD Coronary Heart Disease ,High blood pressure,	2019-02-19	2019-03-06	1	20.96	28.8	0.3	9.8	69.3	11.1	17.3	6.79	1.09	1.7	30.6	7.6	8.4	67.6	64	0.24	266.67	2	1
50	male	53	no	no	no	no	sputum	Gram-negative bacilli	better	CAP ,Type 2 diabetes,	2019-02-21	2019-03-01	1	35.29	86.9	0.9	9.44	76	8.4	14.6	7.17	0.79	1.38	14.4	16.2	17.8	63.2	73	0.21	347.62	1	2
51	male	83	no	no	no	no	sputum	Enterobacter cloacae	better	CAP COPD pulmonary heart disease ，Cerebral infarction,	2018-10-12	2018-10-29	1	177.43	126	1	9.2	85	8.3	6.7	7.82	0.76	0.62	64.3	13.3	14.7	44.3	65	0.24	270.83	2	2
52	female	58	no	no	no	no	sputum	Serratia marcescens	better	CAP ，Cerebral infarction, ,Type 2 diabetes,	2018-08-24	2018-09-18	1	49.87	107	0.9	9.05	81.8	2.9	9.9	7.4	0.26	0.9	11.7	1.7	2.3	124.7	82	0.21	390.48	0	2
53	male	60	no	no	no	no	sputum	Gram-positive cocci	better	CAP	2019-02-06	2019-02-15	1	81.9	122	1	9.01	76.8	5.6	15	6.92	0.5	1.35	40	9	11	77	72	0.24	300	1	2
54	female	65	no	no	no	no	sputum	Acinetobacter baumannii	better	CAP COPD pulmonary heart disease	2018-12-29	2019-01-09	1	16.54	15.1	0.8	9.01	88.8	6.7	4.2	8	0.6	0.38	12.1	4.1	5.9	126.1	90	0.24	375	1	5
55	female	90	no	no	no	no	sputum	Gram-positive cocci	better	CAP COPD Sequelae of cerebral hemorrhage Coronary Heart Disease	2018-12-27	2019-01-10	1	46.6	21.7	1	8.96	74.5	5.4	14.5	6.68	0.48	1.3	15.8	6.8	7.2	57.8	74	0.24	308.33	2	6
56	male	78	no	no	no	no	sputum	Gram-positive cocci	better	CAP ,High blood pressure，Type 2 diabetes,	2019-02-08	2019-02-15	1	120.33	79.5	1.8	8.93	74	7.3	17.8	6.61	0.65	1.59	17.1	6.1	7.9	93.1	70	0.24	291.67	2	2
57	male	68	no	no	no	no	sputum	Maltophilia Stenotrophomonas	better	CAP ,Type 2 diabetes, High blood pressure，Cerebral infarction,	2018-10-23	2018-11-06	1	200	36	0.6	8.88	67.8	9.3	21.1	6.02	0.83	1.87	12	16	16	58	72	0.24	300	2	3
58	male	87	no	no	no	no	sputum	Streptococcus pneumoniae	better	CAP ,High blood pressure，Type 2 diabetes,	2018-11-09	2018-11-19	1	200	396	2.98	8.74	92.99	2.5	4.5	8.13	0.22	0.39	5.5	16.5	17.5	51.5	76	0.24	316.67	2	7
59	male	57	no	no	no	no	sputum	Gram-positive cocci	better	CAP Coronary Heart Disease	2019-02-16	2019-03-10	1	98.53	12	0.2	8.66	60.7	8.5	26.3	5.26	0.74	2.28	98.6	19.6	6.8	110.6	71	0.21	338.1	0	2
60	male	73	no	no	no	no	sputum	Gram-positive cocci	better	CAP ,High blood pressure,	2018-12-12	2018-12-19	1	39.81	307	5	8.59	83.3	9.3	7.1	7.16	0.8	0.61	14.3	8.8	9.2	95.8	79	0.24	329.17	2	3
61	female	92	no	no	no	no	sputum	Gram-positive cocci	better	CAP Coronary Heart Disease ,High blood pressure,	2019-02-14	2019-02-28	1	56.15	38.6	2.74	8.53	81.3	8	10	6.93	0.68	0.85	22.2	9.2	10.8	57.2	75	0.24	312.5	2	7
62	female	89	no	no	no	no	sputum	Gram-positive cocci	better	CAP Coronary Heart Disease ,High blood pressure,	2019-02-19	2019-03-03	1	29.25	8.54	0.5	8.32	76.6	8.7	12.6	6.37	0.72	1.05	24.6	12.6	13.4	83.6	65	0.24	270.83	2	5
63	male	58	no	no	no	no	sputum	Gram-positive cocci	better	CAP pulmonary heart disease ,High blood pressure,	2019-02-27	2019-03-07	1	39.01	64.6	4.5	8.28	70.3	10.6	18.4	5.82	0.88	1.52	62.1	9.1	10.9	50.1	88	0.21	419.05	1	3
64	male	40	no	no	no	no	sputum	Gram-negative bacilli	better	CAP	2019-01-04	2019-01-15	1	37.38	7.85	0.2	8.28	65.3	8.7	24.5	5.41	0.72	2.03	9.2	14.2	15.8	70.2	94	0.21	447.62	1	1
65	male	72	no	no	no	no	sputum	Gram-negative bacilli	better	CAP ,Type 2 diabetes,	2019-03-03	2019-03-12	1	19.24	127	0.63	8.17	84.3	1.3	10.2	6.89	0.11	0.83	22.7	8.7	9.3	61.7	77	0.24	320.83	2	4
66	female	79	no	no	no	no	sputum	Pseudomonas aeruginosa	better	CAP ,High blood pressure,	2018-12-22	2019-01-05	1	23.71	13.3	0.97	8.07	82.6	6.9	7.7	6.67	0.56	0.62	16.6	14.6	15.4	49.6	86	0.24	358.33	2	3
67	male	88	no	no	no	no	sputum	Escherichia Coli	better	CAP Coronary Heart Disease ，Rheumatoid arthritis，	2018-09-09	2018-09-18	1	143.39	163	3.84	7.94	79.5	11.6	8.3	6.31	0.92	0.66	9.8	9.8	10.2	90.8	73	0.24	304.17	2	1
68	female	33	no	no	no	no	sputum	Gram-negative bacilli	better	CAP	2019-01-11	2019-01-17	1	11.14	25	0.8	7.67	76	1.5	12.5	5.83	0.12	0.96	56.6	2.6	3.4	40.6	93	0.21	442.86	0	1
69	male	58	no	no	no	no	sputum	Gram-positive cocci	better	CAP Coronary Heart Disease ,High blood pressure,	2019-03-03	2019-03-13	1	52.95	79.9	0.5	7.64	79.9	1.5	12.3	6.1	0.11	0.94	24.1	9.1	10.9	102.1	91	0.21	433.33	1	3
70	female	72	no	no	no	no	sputum	Gram-positive cocci	better	CAP ,High blood pressure,	2019-01-22	2019-02-02	1	46.79	134	0.2	7.6	84	7.4	8.3	6.38	0.56	0.63	31.3	10.3	11.7	46.3	79	0.24	329.17	2	5
71	female	52	no	no	no	no	sputum	Acinetobacter baumannii	better	CAP ,Type 2 diabetes,	2019-01-10	2019-01-26	1	65.46	166	0.85	7.59	80.6	7.5	11.5	6.12	0.57	0.87	12.7	5.7	6.3	54.7	83	0.21	395.24	0	1
72	male	70	no	no	no	no	sputum	Gram-positive cocci	better	CAP COPD	2019-02-07	2019-02-13	1	71.41	78.3	1.77	7.58	74.2	8.3	16.8	5.62	0.63	1.27	12.6	11.6	12.4	42.6	65	0.24	270.83	2	4
73	male	61	no	no	no	no	sputum	Haemophilus influenzae	better	CAP Coronary Heart Disease ，Old myocardial infarction，	2018-09-09	2018-09-29	1	200	131	2.9	7.48	67.3	8.2	22.1	5.03	0.61	1.65	91.7	11.7	12.3	64.7	93	0.24	387.5	1	1
74	female	65	no	no	no	no	sputum	Gram-positive cocci	better	CAP ,High blood pressure,	2019-01-02	2019-01-10	1	38.49	17.2	0.2	7.48	60.1	7.2	31	4.5	0.54	2.32	9.9	6.9	7.1	49.9	90	0.24	375	2	2
75	male	90	no	no	no	no	sputum	Gram-positive cocci	better	CAP COPD ,High blood pressure，Cerebral infarction,	2019-01-19	2019-01-29	1	33.61	94	1.3	7.37	88.6	2.6	8.8	6.53	0.19	0.65	18.7	5.7	6.3	63.7	64	0.24	266.67	1	1
76	male	84	no	no	no	no	sputum	Acinetobacter baumannii	better	CAP ,High blood pressure,	2018-11-30	2018-12-20	1	6.98	78.7	4.27	7.31	65	10.3	20.2	4.75	0.75	1.48	13	11	11	86	73	0.24	304.17	2	2
77	male	40	no	no	no	no	sputum	Klebsiella pneumoniae	better	CAP ，Sequelae of cerebral hemorrhage, Diabetes insipidus, epilepsy，	2018-09-18	2018-09-28	1	7.36	55.3	1.7	7.24	71.6	11	16.7	5.18	0.8	1.21	36.4	27.4	2.8	17.4	81	0.21	385.71	0	5
78	male	71	no	no	no	no	sputum	Gram-positive cocci	better	CAP ,High blood pressure,	2019-01-10	2019-01-22	1	62.61	25.2	0.8	6.8	71.4	9.4	16.3	4.86	0.64	1.11	13.5	11.5	12.5	67.5	64	0.24	266.67	2	5
79	male	87	no	no	no	no	sputum	Gram-positive cocci	better	CAP ,High blood pressure,Coronary Heart Disease	2018-11-23	2018-12-07	1	33.94	140	0.6	6.77	82.2	6.2	9.9	5.56	0.42	0.67	19.8	20.8	7.1	79.8	74	0.24	308.33	2	5
80	male	53	no	no	no	no	sputum	Gram-positive cocci	better	CAP COPD	2019-02-11	2019-02-15	1	23.25	145	1	6.51	62.9	7.4	28.9	4.09	0.48	1.88	37.4	7.4	8.6	60.4	79	0.21	376.19	1	2
81	male	63	no	no	no	no	sputum	Acinetobacter baumannii	better	CAP ,High blood pressure,	2019-01-22	2019-02-07	1	33.56	157	0.63	6.5	80.7	2.4	17.7	5.25	0.16	1.15	21.7	12.7	13.3	94.7	94	0.24	391.67	1	3
82	female	74	no	no	no	no	sputum	Gram-negative bacilli	better	CAP COPD ,High blood pressure,	2018-12-22	2018-12-27	1	63.04	13.6	0.2	6.43	72.7	8.2	17.4	4.67	0.53	1.12	6.5	2.5	3.5	70.5	86	0.24	358.33	1	3
83	male	23	no	no	no	no	sputum	Gram-positive cocci	better	CAP	2018-09-12	2018-09-23	1	200	7.44	2	6.39	73.5	2.3	19.1	4.7	0.15	1.22	27.1	7.1	8.9	66.1	76	0.21	361.9	1	2
84	female	66	no	no	no	no	sputum	Gram-positive cocci	better	CAP	2018-12-04	2018-12-19	1	75.65	62.1	0.2	6.38	83.4	3.3	13	5.32	0.21	0.83	20.4	7.4	8.6	46.4	85	0.24	354.17	2	2
85	male	63	no	no	no	no	sputum	Gram-positive cocci	better	CAP COPD ，Cerebral infarction，	2019-01-18	2019-01-26	1	36.84	7	0.5	6.38	84.3	6	9.2	5.38	0.38	0.59	45.9	8.9	9.1	48.9	81	0.24	337.5	1	1
86	female	88	no	no	no	no	sputum	Klebsiella pneumoniae	better	CAP Coronary Heart Disease ，Unstable angina, High blood pressure，Chronic bronchitis， 腹主动脉瘤 十二指肠及空肠憩室	2019-02-22	2019-03-18	1	34.22	8.32	0.2	6.1	67.8	10.7	17.5	4.14	0.65	1.07	9.5	6.5	7.5	59.5	60	0.24	250	2	5
87	male	84	no	no	no	no	sputum	Pseudomonas aeruginosa	better	CAP Coronary Heart Disease	2018-10-07	2018-10-17	1	200	81.9	4.2	6	82.9	7.7	7.6	4.97	0.46	0.46	51.7	6.7	7.3	111.7	88	0.24	366.67	2	2
88	female	84	no	no	no	no	sputum	Gram-negative bacilli	better	CAP ,High blood pressure，Cerebral infarction,	2018-12-24	2019-01-05	1	6.62	3.66	0.2	5.78	70.7	9.5	17.1	4.09	0.55	0.99	6.8	9.8	10.2	68.8	81	0.24	337.5	2	2
89	male	76	no	no	no	no	sputum	Pseudomonas aeruginosa	better	CAP Parkinson's Disease	2018-09-03	2018-09-12	1	55.33	4.67	0.3	5.71	75.3	3.5	21	4.3	0.2	1.2	31.6	10.6	16.4	29.6	72	0.24	300	2	2
90	male	73	no	no	no	no	sputum	Klebsiella pneumoniae	better	CAP COPD	2019-03-01	2019-03-14	1	48.97	164	5.4	5.65	86.4	3.7	8.5	4.88	0.21	0.48	18.1	23.1	8.3	100.1	79	0.24	329.17	2	4
91	male	21	no	no	no	no	sputum	Gram-positive cocci	better	CAP	2019-01-14	2019-01-21	1	38.16	17.4	0.4	5.62	77.5	6.8	14.4	4.36	0.38	0.81	38.9	13.9	14.1	75.9	75	0.21	357.14	1	5
92	female	50	no	no	no	no	sputum	Gram-positive cocci	better	CAP	2018-12-02	2018-12-09	1	93.56	143	0.6	5.6	79.8	3.6	16.6	4.47	0.2	0.93	26.4	4.4	5.6	43.4	76	0.21	361.9	0	1
93	female	49	no	no	no	no	sputum	Gram-positive cocci	better	CAP ，Lung adenocarcinoma, High blood pressure,	2018-09-10	2018-09-14	1	78.97	238	3.4	5.59	62.8	16.6	19.3	3.51	0.93	1.08	20.6	8.6	9.4	62.6	84	0.21	400	1	2
94	female	86	no	no	no	no	sputum	Gram-positive cocci	better	CAP COPD pulmonary heart disease	2019-02-01	2019-02-09	1	49.17	23	0.9	5.29	78	2.1	19.7	4.13	0.11	1.04	7.6	8.6	9.4	75.6	70	0.24	291.67	2	7
95	female	87	no	no	no	no	sputum	Gram-negative bacilli	better	CAP ,High blood pressure,	2019-01-07	2019-01-17	1	9.57	3.83	0.2	5.26	72.8	6.8	19	3.83	0.36	1	8	8	8	78	79	0.24	329.17	2	5
96	male	82	no	no	no	no	sputum	Gram-positive cocci	better	CAP COPD pulmonary heart disease ,High blood pressure,	2019-02-09	2019-02-18	1	29.76	3.31	0.5	5.24	89.3	0.2	10.5	4.68	0.01	0.55	5.3	8.3	9.7	90.3	60	0.24	250	2	4
97	female	69	no	no	no	no	sputum	Gram-positive cocci	better	CAP	2019-02-04	2019-02-11	1	15	27.5	0.02	5.21	63.2	5.6	29.8	3.29	0.29	1.55	7	9	11	55	70	0.24	291.67	2	2
98	female	86	no	no	no	no	sputum	Pseudomonas aeruginosa	better	CAP	2018-12-25	2019-01-11	1	41.01	4.71	0.3	5.09	55.4	11	31.2	2.82	0.56	1.59	8.6	8.6	9.4	78.6	67	0.24	279.17	2	3
99	female	92	no	no	no	no	sputum	Gram-positive cocci	better	CAP Coronary Heart Disease	2018-09-08	2018-09-20	1	52.49	2.51	0.4	4.83	88.2	1	10	4.26	0.05	0.48	67.8	7.8	5.2	76.8	74	0.24	308.33	1	1
100	male	68	no	no	no	no	sputum	Gram-positive cocci	better	CAP	2018-09-10	2018-09-23	1	78.73	70.9	1	4.55	62.2	13	18.9	2.83	0.59	0.86	11.2	6.2	7.8	73.2	89	0.24	370.83	2	1
101	female	68	no	no	no	no	sputum	Gram-negative bacilli	better	CAP ,High blood pressure,COPD Coronary Heart Disease，Cerebral infarction，	2019-01-03	2019-01-12	1	7.96	3.23	0.7	4.55	76.3	2.4	10.2	3.47	0.11	0.46	13.4	24.4	8.5	62.4	86	0.24	358.33	2	4
102	female	53	no	no	no	no	sputum	Gram-positive cocci	better	CAP	2018-12-22	2018-12-27	1	5.9	3	2.52	4.52	50	3.3	42.7	2.26	0.15	1.93	9.7	5.7	6.3	51.7	90	0.21	428.57	0	1
103	male	86	no	no	no	no	sputum	Gram-negative bacilli	better	CAP ,High blood pressure，Cerebral infarction,Renal insufficiency，	2019-01-24	2019-01-29	1	16.54	83.1	3.37	4.2	80.3	8.3	11.2	3.37	0.35	0.47	48.5	5.5	6.5	159.5	73	0.24	304.17	1	1
104	male	86	no	no	no	no	sputum	Acinetobacter baumannii	better	CAP Coronary Heart Disease ,High blood pressure,	2018-11-26	2018-12-18	1	71.72	73.5	6.41	3.51	70	7.1	22.5	2.46	0.25	0.79	5.2	21.2	7.6	105.2	72	0.24	300	2	3
105	female	83	no	no	no	no	sputum	Enterobacter cloacae	better	CAP ，Esophageal cancer，	2018-07-20	2018-07-27	1	33.31	65.9	0.9	3.28	47.8	4	42.4	1.57	0.13	1.39	5	12	14	72	68	0.24	283.33	2	4
106	female	52	no	no	no	no	sputum	Gram-positive cocci	better	CAP	2019-01-19	2019-01-27	1	42.47	58.3	0.2	3.22	60.9	5.3	25	1.96	0.17	0.81	7.1	6.1	17.9	47.1	84	0.21	400	1	5
107	male	46	no	no	no	no	sputum	Gram-positive cocci	better	CAP	2019-01-26	2019-02-13	1	19.38	67.9	1.2	2.42	48.4	8.3	41.7	1.17	0.2	1.01	74.3	12.3	13.7	52.3	82	0.21	390.48	1	5
108	female	80	no	no	no	no	sputum	Klebsiella pneumoniae	better	CAP ，Old myocardial infarction, High blood pressure,	2018-08-06	2018-08-21	1	20.36	14	0.5	2	86	4.7	8.7	1.72	0.09	0.17	33.7	16.7	7.3	61.3	69	0.24	287.5	2	1
109	female	52	no	no	no	no	sputum	Aspergillus	better	CAP Coronary Heart Disease ,High blood pressure，Type 2 diabetes,	2018-07-04	2018-07-06	2	16.27	27.2	6.81	28.67	98.3	0.7	0.9	28.18	0.2	0.26	30	38	14	122	84	0.21	400	1	4
110	male	80	no	no	no	no	sputum	Aspergillus	better	CAP COPD pulmonary heart disease Coronary Heart Disease ,High blood pressure,	2018-12-02	2018-12-22	2	168.39	8.99	0.5	22.26	85.3	8.4	6.2	18.99	1.87	1.38	5	10	7.3	73	86	0.24	358.33	2	2
111	female	37	no	no	no	no	sputum	Aspergillus	better	CAP ,High blood pressure，Cerebral infarction,	2018-07-20	2018-08-17	2	42.17	132	0.6	21.95	85	6.6	7.4	18.66	1.45	1.62	16.6	29.3	10	59.6	88	0.21	419.05	1	1
112	male	92	no	no	no	no	sputum	Aspergillus	better	CAP Coronary Heart Disease ，Esophageal cancer，	2019-01-27	2019-02-02	2	38.75	120	4.4	15.41	87.1	4.9	8	13.42	0.76	1.23	32.5	9.5	10.5	86.5	63	0.24	262.5	2	4
113	male	67	no	no	no	no	sputum	Aspergillus	better	CAP Coronary Heart Disease 2,Type 2 diabetes, High blood pressure,	2018-10-26	2018-11-07	2	71.46	132	1.7	15.06	75.5	4.7	15.8	11.37	0.71	2.38	14.7	3.7	4.3	73.7	82	0.24	341.67	1	5
114	male	51	no	no	no	no	sputum	Aspergillus	better	CAP COPD 陈久性，Cerebral infarction,	2018-10-11	2018-11-17	2	40.68	134	6.36	14.18	90.5	3.7	5.7	12.83	0.52	0.81	26.9	18.9	6.4	146.9	76	0.21	361.9	0	5
115	male	65	no	no	no	no	sputum	Aspergillus	better	CAP ,Type 2 diabetes, Stomach cancer surgery，	2018-10-13	2018-11-02	2	67.76	55.1	0.7	11.82	81	6.3	12.1	9.57	0.74	1.43	28.1	9.1	10.9	43.1	94	0.24	391.67	2	5
116	male	50	no	no	no	no	sputum	Aspergillus	better	CAP 左，Lung adenocarcinoma，	2019-01-28	2019-02-10	2	73.41	251	18.3	11.51	77.3	6.8	15.6	8.9	0.78	1.8	26.6	6.6	7.4	45.6	74	0.21	352.38	1	3
117	male	57	no	no	no	no	sputum	Aspergillus	better	CAP COPD Coronary Heart Disease ,High blood pressure,	2019-02-12	2019-02-22	2	110.26	30.2	0.57	11.12	77	4.9	17.6	8.56	0.54	1.96	13.3	9.3	10.7	59.3	72	0.21	342.86	1	4
118	male	70	no	no	no	no	sputum	Aspergillus	better	CAP ,High blood pressure, Type 2 diabetes，Cerebral infarction,	2018-10-30	2018-11-13	2	8.38	18.9	0.4	10.89	84	5.1	9.5	9.15	0.56	1.03	18	11	11	118	79	0.24	329.17	2	1
119	male	77	no	no	no	no	sputum	Aspergillus	better	CAP ,Type 2 diabetes,	2018-10-11	2018-10-31	2	15.01	27.5	2.9	9.38	91.4	3.2	4.9	8.57	0.3	0.46	25	4	7.8	78	79	0.24	329.17	2	2
120	female	67	no	no	no	no	sputum	Aspergillus	better	CAP	2019-01-11	2019-01-26	2	16.47	72.8	3.6	8.52	63.6	7.5	27.2	5.42	0.64	2.32	24	7	7	116	92	0.24	383.33	2	2
121	female	74	no	no	no	no	sputum	Aspergillus	better	CAP，Lung cancer surgery，	2018-12-22	2018-12-30	2	15.26	7.79	0.2	8.04	79.3	8.5	11.3	6.38	0.68	0.91	9.5	3.5	4.5	53.5	88	0.24	366.67	1	4
122	male	22	no	no	no	no	sputum	Aspergillus	better	CAP，COPD,Coronary Heart Disease	2018-08-07	2018-08-17	2	58.6	101	1.5	7.8	60.4	3.5	3.5	4.71	0.27	0.27	19.2	5.2	12.8	74	72	0.21	342.86	1	4
123	male	88	no	no	no	no	sputum	Aspergillus	better	CAP	2018-11-27	2018-11-29	2	8.81	8.02	0.9	6.31	67.2	9	22	4.24	0.57	1.39	27.2	11.2	12.8	128.2	78	0.24	325	2	3
124	female	91	no	no	no	no	sputum	Aspergillus	better	CAP ，Cerebral infarction,	2018-08-25	2018-09-09	2	200	52.9	0.2	5.82	67	4.5	25.8	3.9	0.26	1.5	36.2	15.2	15.8	125.2	64	0.24	266.67	2	4
125	male	81	no	no	no	no	sputum	Aspergillus	better	CAP COPD ，Rectal cancer，	2019-01-02	2019-01-12	2	39.16	2.37	0.6	5.73	86.7	6.4	6.7	4.97	0.37	0.38	29.6	14.6	15.4	72.6	60	0.24	250	2	2
126	female	69	no	no	no	no	sputum	Aspergillus	better	CAP ，Pituitary tumor surgery，	2018-12-20	2019-01-03	2	226.4	94.1	0.8	5.53	84.5	1.6	13.9	4.67	0.09	0.77	25.9	3.9	4.1	33.9	79	0.24	329.17	1	3
127	female	75	no	no	no	no	sputum	Aspergillus	better	CAP Coronary Heart Disease	2018-10-16	2018-11-13	2	153.35	140	0.3	5.35	76.6	9	10.7	4.1	0.48	0.57	24.3	6.3	7.7	42.3	77	0.24	320.83	2	2
128	female	76	no	no	no	no	sputum	Aspergillus	better	CAP ，Cerebral infarction, Coronary Heart Disease ,Type 2 diabetes,	2019-01-09	2019-01-29	2	10	7.72	4.6	4.38	94	2.9	2.7	4.12	0.13	0.12	8	4	8	36	62	0.24	258.33	2	1
129	female	82	no	no	no	no	sputum	Aspergillus	better	CAP ,High blood pressure,	2019-02-04	2019-02-14	2	40.25	2.27	0.2	3.73	66.5	6.7	26.5	2.48	0.25	0.99	12.3	6.3	7.7	52.3	68	0.24	283.33	2	3
130	male	82	no	no	no	no	sputum	Influenza A virus	better	CAP	2019-02-19	2019-03-04	3	10.32	125	0.17	9.7	87.7	5.8	6	8.51	0.56	0.58	59.8	22.8	7.7	63.8	73	0.24	304.17	2	3
131	male	64	no	no	no	no	sputum	Human parainfluenza virus	better	CAP ,High blood pressure,	2018-10-15	2018-10-24	3	13.3	94.4	0.05	9.56	86	1.5	4.5	8.22	0.14	0.43	26.1	12.1	13.9	71.1	95	0.24	395.83	1	3
132	female	67	no	no	no	no	sputum	Influenza A virus	dead	CAP ，Old cerebral hemorrhage，	2018-12-30	2019-02-25	3	16.7	22.6	0.18	9.55	90	2.8	6.9	8.6	0.27	0.66	21	16	6	58	80	0.24	333.33	1	3
133	female	27	no	no	no	no	sputum	Adenovirus	better	CAP	2019-02-28	2019-03-12	3	10.3	106	0.19	9.13	79.7	5	11.5	7.28	0.46	1.05	37	6	8	37	70	0.21	333.33	1	4
134	male	69	no	no	no	no	sputum	Influenza A virus	better	CAP ,High blood pressure,Coronary Heart Disease	2019-01-29	2019-02-04	3	31.7	221	0.62	8.99	81.4	12.5	5.7	7.32	1.12	0.51	34.7	7.7	8.3	153.7	88	0.24	366.67	2	4
135	male	31	no	no	no	no	sputum	Respiratory syncytial virus	better	CAP	2018-10-15	2018-10-21	3	10.6	20.6	0.08	8.96	81.8	3	12.9	7.33	0.27	1.16	72.1	5.1	6.9	86.1	76	0.21	361.9	0	5
136	male	60	no	no	no	no	sputum	Influenza A virus	better	CAP Coronary Heart Disease	2019-02-12	2019-02-18	3	14.7	29.8	0.17	8.53	71.1	5.5	22.6	6.06	0.47	1.93	12.7	8.7	9.3	74.7	70	0.24	291.67	1	4
137	male	93	no	no	no	no	sputum	Influenza A virus	better	CAP AECOPD	2019-02-16	2019-02-26	3	18.3	124	0.02	7.94	85.5	3.3	9.6	6.79	0.26	0.76	12.4	18.4	6.5	49.4	74	0.24	308.33	1	4
138	female	49	no	no	no	no	sputum	Influenza A virus	better	CAP	2019-01-14	2019-01-20	3	7.51	9.73	0.06	7.33	76.5	1.2	7.5	5.61	0.09	0.55	18.9	9.9	10.1	70.9	88	0.21	419.05	1	4
139	male	76	no	no	no	no	sputum	Influenza A virus	better	CAP	2019-02-05	2019-02-13	3	5.9	23.9	0.4	7.32	83.6	3.4	12.9	6.12	0.25	0.94	17.7	6.7	7.3	76.7	77	0.24	320.83	2	4
140	female	58	no	no	no	no	sputum	Influenza A virus	better	CAP	2019-01-12	2019-01-18	3	5.9	10.1	0.02	6.71	82	12	13	5.5	0.81	0.87	17.1	16.1	16.9	54.1	94	0.21	447.62	1	3
141	female	74	no	no	no	no	sputum	Influenza A virus	better	CAP Coronary Heart Disease	2019-01-18	2019-01-25	3	5.9	11.4	0.06	5.18	67.6	6.5	14	3.5	0.34	0.73	15.8	8.1	8.5	58.8	82	0.24	341.67	2	3
142	female	62	no	no	no	no	sputum	Influenza A virus	better	CAP	2019-01-19	2019-01-27	3	10.4	63.1	0.1	5.08	74	6.1	18.3	3.76	0.31	0.93	20.7	6.7	7.3	76.7	77	0.24	320.83	1	5
143	male	66	no	no	no	no	sputum	Influenza A virus	better	CAP pulmonary heart disease CAP COPD Coronary Heart Disease	2018-12-25	2019-01-19	3	18.8	13.1	0.06	4.85	93	1.4	5.2	4.51	0.07	0.25	26.3	5.3	6.7	88.3	91	0.24	379.17	1	2
144	female	83	no	no	no	no	sputum	Influenza A virus	better	CAP COPD Coronary Heart Disease	2019-02-12	2019-02-19	3	8.36	8.63	0.19	4.78	81.4	4.4	13.4	3.89	0.21	0.64	50.6	5.6	6.4	52.6	73	0.24	304.17	1	5
145	male	31	no	no	no	no	sputum	Influenza A virus	better	CAP	2019-01-11	2019-01-16	3	5.9	6.97	0.07	4.32	36.1	8.3	54.9	1.56	0.36	2.37	25.4	5.4	6.6	99.4	83	0.21	395.24	0	1
146	male	71	no	no	no	no	sputum	Influenza B virus	better	CAP ,High blood pressure,Coronary Heart Disease ，Old myocardial infarction，	2019-01-03	2019-01-10	3	19.9	155	0.07	3.89	67.5	9.3	22.9	2.63	0.36	0.89	22.1	10.1	11.9	100.1	74	0.24	308.33	2	4
147	female	79	no	no	no	no	sputum	Influenza A virus	better	CAP ,High blood pressure,Coronary Heart Disease ,Type 2 diabetes,	2019-02-21	2019-03-01	3	10.66	5.75	0.06	3.87	38	3.8	52.7	1.47	0.15	2.04	19.6	8.6	9.4	69.6	69	0.24	287.5	2	2
148	female	66	no	no	no	no	sputum	Influenza A virus	better	CAP ,Type 2 diabetes, Cerebral infarction,	2019-02-20	2019-02-28	3	28.2	4.63	0.05	3.79	57.3	11.3	29.6	2.17	0.43	1.12	38.6	11.6	12.4	44.6	85	0.24	354.17	2	3
149	male	71	no	no	no	no	sputum	Influenza A virus	better	CAP Coronary Heart Disease	2019-01-15	2019-01-23	3	5.9	40.6	0.55	3.36	80.3	4.8	14.6	2.7	0.16	0.49	50.5	21.5	7.5	99.5	74	0.24	308.33	2	5
150	male	88	no	no	no	no	sputum	Influenza A virus	better	CAP ,High blood pressure，Cerebral infarction,	2019-03-06	2019-03-16	3	11.05	2.67	0.17	3.03	61	10.6	28.1	1.85	0.32	0.85	16	6	6	74	60	0.24	250	1	5
151	female	62	no	no	no	no	sputum	Influenza A virus	better	CAP ,High blood pressure,Coronary Heart Disease	2019-01-27	2019-02-03	3	6.11	24	0.02	2.51	47.8	4.4	47.8	1.2	0.11	1.2	9	9	11	54	92	0.24	383.33	1	2
152	female	78	no	no	no	no	sputum	Influenza A virus	better	CAP ,Type 2 diabetes,	2019-01-17	2019-01-19	3	13.1	66.1	1.3	2.27	85	2.5	12.4	1.93	0.06	0.28	62.9	8.9	9.1	95.9	85	0.24	354.17	2	3
153	male	27	no	no	no	no	sputum	Adenovirus	better	CAP	2019-01-27	2019-02-09	3	16.44	114	0.46	2.27	69.2	3.5	27.3	1.57	0.08	0.62	50.9	8.9	9.1	64.9	83	0.21	395.24	1	5
154	female	89	no	no	no	no	sputum	Influenza A virus	better	CAP Coronary Heart Disease ，Cerebral infarction, ,Type 2 diabetes, High blood pressure,	2019-02-12	2019-02-27	3	7.83	6.87	0.02	2.19	73.6	12.9	12	1.61	0.28	0.26	13.1	19.1	2.9	47.1	60	0.24	250	1	5
155	female	84	no	no	no	no	sputum	Influenza A virus	better	CAP ,High blood pressure，Meningioma，Alzheimer's disease，	2019-02-12	2019-02-25	3	15.8	74.9	0.45	2.07	94.6	2.2	3.3	1.96	0.05	0.07	40.3	7.3	8.7	44.3	87	0.24	362.5	2	3
156	male	77	no	no	no	no	sputum	Influenza A virus	better	CAP Coronary Heart Disease	2018-10-15	2018-10-21	3	15.1	295	0.53	1.99	90.6	3	6.3	1.8	0.06	0.13	46.8	20.8	7.1	119.8	68	0.24	283.33	2	5
157	male	25	no	no	no	no	sputum	Adenovirus	better	CAP	2018-09-04	2018-09-21	3	17.1	157	1.03	1.64	85.5	5.9	6.2	1.4	0.1	0.1	38.7	6	6	72	87	0.21	414.29	0	4
158	male	61	no	no	no	no	sputum	Influenza A virus	better	CAP ，Stomach cancer surgery，	2019-02-05	2019-02-13	3	8.19	27.8	0.32	1.56	80.8	2.5	10.8	1.26	0.04	0.17	31	5	7	55	72	0.24	300	1	2
159	male	80	no	no	no	no	sputum	Influenza A virus	better	CAP COPD Coronary Heart Disease	2019-01-11	2019-02-09	3	11.16	41.7	0.02	1.52	84.3	11.3	3.77	1.28	0.17	0.06	8.6	12.6	13.4	61.6	86	0.24	358.33	2	6
160	male	75	no	no	no	no	sputum	Influenza A virus	better	CAP Coronary Heart Disease	2019-01-24	2019-01-31	3	15.3	79.9	0.35	1.47	91.5	4.4	3.8	1.35	0.06	0.06	5.2	22.2	7.9	86.2	88	0.24	366.67	2	3
161	male	65	no	no	no	no	sputum	Influenza A virus	better	CAP ,High blood pressure，Type 2 diabetes,	2019-02-01	2019-02-07	3	8.46	85.6	0.37	1.28	85.2	2.2	11.3	1.09	0.03	0.14	20.1	6.1	7.9	62.1	90	0.24	375	2	4
162	female	68	no	no	no	no	sputum	Influenza A virus	better	CAP COPD ,High blood pressure,	2019-02-24	2019-02-26	3	12.1	42.8	0.64	1.21	93.1	3.3	3.2	1.13	0.04	0.04	20.3	5.3	6.7	39.3	78	0.24	325	1	5

## Sheet: Sheet2
				The coordinates of the curve										The coordinates of the curve
				Test result variable	Positive if greater than or equal to a	Sensitivity	1-Specificity	Yorden Index	Positive likelihood ratio	Negative likelihood ratio				Test result variable	Positive if greater than or equal to a	Sensitivity	1-Specificity	Yorden Index	Positive likelihood ratio	Negative likelihood ratio
		Bacteria-virus		HBP	4.9	1	1	0	1	#REF!		Fungus-virus		HBP	4.9	1	1	0	1	#REF!
					20.05	0.861111	0.0606061	0.800505	14.2083	#REF!					35.225	0.666667	0	0.666667	#DIV/0!	#REF!
					19.02	0.888889	0.0909091	0.79798	9.77778	#REF!					29.95	0.666667	0.030303	0.636364	22	#REF!
					20.28	0.851852	0.0606061	0.791246	14.0556	#REF!					38.955	0.619048	0	0.619048	#DIV/0!	#REF!
					19.31	0.87963	0.0909091	0.788721	9.67593	#REF!					24.05	0.666667	0.0606061	0.606061	11	#REF!
					20.66	0.842593	0.0606061	0.781987	13.9028	#REF!					19.35	0.666667	0.0909091	0.575758	7.33333	#REF!
					19.385	0.87037	0.0909091	0.779461	9.57407	#REF!					39.705	0.571429	0	0.571429	#DIV/0!	#REF!
					32.14	0.777778	0	0.777778	#DIV/0!	#REF!					18.55	0.666667	0.121212	0.545455	5.5	#REF!
					21.11	0.833333	0.0606061	0.772727	13.75	#REF!					40.465	0.52381	0	0.52381	#DIV/0!	#REF!
					19.645	0.861111	0.0909091	0.770202	9.47222	#REF!					14.855	0.857143	0.333333	0.52381	2.57143	#REF!
					32.945	0.768519	0	0.768519	#DIV/0!	#REF!					16.035	0.761905	0.242424	0.519481	3.14286	#REF!
					18.55	0.888889	0.121212	0.767677	7.33333	#REF!					17.7	0.666667	0.151515	0.515152	4.4	#REF!
					28.725	0.796296	0.030303	0.765993	26.2778	#REF!					15.18	0.809524	0.30303	0.506494	2.67143	#REF!
					21.905	0.824074	0.0606061	0.763468	13.5972	#REF!					16.455	0.714286	0.212121	0.502165	3.36735	#REF!
					33.435	0.759259	0	0.759259	#DIV/0!	#REF!					14	0.857143	0.363636	0.493506	2.35714	#REF!
					29.505	0.787037	0.030303	0.756734	25.9722	#REF!					15.55	0.761905	0.272727	0.489177	2.79365	#REF!
					22.9	0.814815	0.0606061	0.754209	13.4444	#REF!					16.9	0.666667	0.181818	0.484848	3.66667	#REF!
					33.585	0.75	0	0.75	#DIV/0!	#REF!					15.055	0.809524	0.333333	0.47619	2.42857	#REF!
					30.73	0.777778	0.030303	0.747475	25.6667	#REF!					41.425	0.47619	0	0.47619	#DIV/0!	#REF!
					23.48	0.805556	0.0606061	0.744949	13.2917	#REF!					16.355	0.714286	0.242424	0.471861	2.94643	#REF!
					33.775	0.740741	0	0.740741	#DIV/0!	#REF!					13.2	0.857143	0.393939	0.463203	2.17582	#REF!
					17.7	0.888889	0.151515	0.737374	5.86667	#REF!					15.28	0.761905	0.30303	0.458874	2.51429	#REF!
					25.955	0.796296	0.0606061	0.73569	13.1389	#REF!					16.585	0.666667	0.212121	0.454545	3.14286	#REF!
					34.08	0.731481	0	0.731481	#DIV/0!	#REF!					12.6	0.857143	0.424242	0.4329	2.02041	#REF!
					34.65	0.722222	0	0.722222	#DIV/0!	#REF!					50.385	0.428571	0	0.428571	#DIV/0!	#REF!
					35.185	0.712963	0	0.712963	#DIV/0!	#REF!					11.63	0.857143	0.454545	0.402597	1.88571	#REF!
					16.9	0.888889	0.181818	0.707071	4.88889	#REF!					63.18	0.380952	0	0.380952	#DIV/0!	#REF!
					16.49	0.907407	0.212121	0.695286	4.27778	#REF!					11.105	0.857143	0.484848	0.372294	1.76786	#REF!
					35.88	0.694444	0	0.694444	#DIV/0!	#REF!					10.855	0.857143	0.515152	0.341991	1.66387	#REF!
					36.655	0.685185	0	0.685185	#DIV/0!	#REF!					69.61	0.333333	0	0.333333	#DIV/0!	#REF!
					16.62	0.888889	0.212121	0.676768	4.19048	#REF!					10.63	0.857143	0.545455	0.311688	1.57143	#REF!
					36.98	0.675926	0	0.675926	#DIV/0!	#REF!					8.37	1	0.69697	0.30303	1.43478	#REF!
					37.25	0.666667	0	0.666667	#DIV/0!	#REF!					72.435	0.285714	0	0.285714	#DIV/0!	#REF!
					16.12	0.907407	0.242424	0.664983	3.74306	#REF!					8.635	0.952381	0.666667	0.285714	1.42857	#REF!
					37.77	0.657407	0	0.657407	#DIV/0!	#REF!					10.5	0.857143	0.575758	0.281385	1.48872	#REF!
					38.325	0.648148	0	0.648148	#DIV/0!	#REF!					8.275	1	0.727273	0.272727	1.375	#REF!
					38.7	0.638889	0	0.638889	#DIV/0!	#REF!					8.42	0.952381	0.69697	0.255411	1.36646	#REF!
					15.55	0.907407	0.272727	0.63468	3.32716	#REF!					10.36	0.857143	0.606061	0.251082	1.41429	#REF!
					38.96	0.62963	0	0.62963	#DIV/0!	#REF!					8.01	1	0.757576	0.242424	1.32	#REF!
					39.41	0.62037	0	0.62037	#DIV/0!	#REF!					91.835	0.238095	0	0.238095	#DIV/0!	#REF!
					40.325	0.611111	0	0.611111	#DIV/0!	#REF!					9.405	0.904762	0.666667	0.238095	1.35714	#REF!
					15.2	0.907407	0.30303	0.604377	2.99444	#REF!					10.31	0.857143	0.636364	0.220779	1.34694	#REF!
					40.925	0.601852	0	0.601852	#DIV/0!	#REF!					7.67	1	0.787879	0.212121	1.26923	#REF!
					41.625	0.592593	0	0.592593	#DIV/0!	#REF!					131.805	0.190476	0	0.190476	#DIV/0!	#REF!
					42.355	0.583333	0	0.583333	#DIV/0!	#REF!					10.15	0.857143	0.666667	0.190476	1.28571	#REF!
					14.85	0.916667	0.333333	0.583333	2.75	#REF!					6.81	1	0.818182	0.181818	1.22222	#REF!
					15.05	0.907407	0.333333	0.574074	2.72222	#REF!					6.005	1	0.848485	0.151515	1.17857	#REF!
					44.205	0.574074	0	0.574074	#DIV/0!	#REF!					160.87	0.142857	0	0.142857	#DIV/0!	#REF!
					46.27	0.564815	0	0.564815	#DIV/0!	#REF!					184.195	0.0952381	0	0.0952381	#DIV/0!	#REF!
					13.97	0.925926	0.363636	0.56229	2.5463	#REF!					213.2	0.047619	0	0.047619	#DIV/0!	#REF!
					46.675	0.555556	0	0.555556	#DIV/0!	#REF!					227.4	0	0	0	#DIV/0!	#REF!
					14.67	0.916667	0.363636	0.55303	2.52083	#REF!				PCT	-0.98	1	1	0	1	#REF!
					46.77	0.546296	0	0.546296	#DIV/0!	#REF!					0.195	1	0.363636	0.636364	2.75	#REF!
					47.27	0.537037	0	0.537037	#DIV/0!	#REF!					0.56	0.714286	0.121212	0.593074	5.89286	#REF!
					13.2	0.925926	0.393939	0.531987	2.35043	#REF!					0.48	0.761905	0.181818	0.580087	4.19048	#REF!
					47.82	0.527778	0	0.527778	#DIV/0!	#REF!					0.185	1	0.424242	0.575758	2.35714	#REF!
					48.01	0.518519	0	0.518519	#DIV/0!	#REF!					0.54	0.714286	0.151515	0.562771	4.71429	#REF!
					48.43	0.509259	0	0.509259	#DIV/0!	#REF!					0.455	0.761905	0.212121	0.549784	3.59184	#REF!
					12.6	0.925926	0.424242	0.501684	2.18254	#REF!					0.175	1	0.454545	0.545455	2.2	#REF!
					48.85	0.5	0	0.5	#DIV/0!	#REF!					0.585	0.666667	0.121212	0.545455	5.5	#REF!
					49.07	0.490741	0	0.490741	#DIV/0!	#REF!					0.385	0.809524	0.272727	0.536797	2.96825	#REF!
					49.52	0.481481	0	0.481481	#DIV/0!	#REF!					0.515	0.714286	0.181818	0.532468	3.92857	#REF!
					51.18	0.472222	0	0.472222	#DIV/0!	#REF!					0.426	0.761905	0.242424	0.519481	3.14286	#REF!
					11.63	0.925926	0.454545	0.47138	2.03704	#REF!					0.67	0.571429	0.0606061	0.510823	9.42857	#REF!
					52.69	0.462963	0	0.462963	#DIV/0!	#REF!					0.36	0.809524	0.30303	0.506494	2.67143	#REF!
					52.92	0.453704	0	0.453704	#DIV/0!	#REF!					0.25	0.857143	0.363636	0.493506	2.35714	#REF!
					11.095	0.935185	0.484848	0.450337	1.92882	#REF!					0.401	0.761905	0.272727	0.489177	2.79365	#REF!
					53.87	0.444444	0	0.444444	#DIV/0!	#REF!					0.63	0.571429	0.0909091	0.480519	6.28571	#REF!
					11.15	0.925926	0.484848	0.441077	1.90972	#REF!					0.335	0.809524	0.333333	0.47619	2.42857	#REF!
					54.995	0.435185	0	0.435185	#DIV/0!	#REF!					0.75	0.52381	0.0606061	0.463203	8.64286	#REF!
					55.265	0.425926	0	0.425926	#DIV/0!	#REF!					0.135	1	0.545455	0.454545	1.83333	#REF!
					10.855	0.935185	0.515152	0.420034	1.81536	#REF!					0.61	0.571429	0.121212	0.450216	4.71429	#REF!
					55.74	0.416667	0	0.416667	#DIV/0!	#REF!					0.31	0.809524	0.363636	0.445887	2.22619	#REF!
					56.64	0.407407	0	0.407407	#DIV/0!	#REF!					1.4	0.428571	0	0.428571	#DIV/0!	#REF!
					57.27	0.398148	0	0.398148	#DIV/0!	#REF!					0.09	1	0.575758	0.424242	1.73684	#REF!
					10.63	0.935185	0.545455	0.389731	1.71451	#REF!					0.85	0.47619	0.0606061	0.415584	7.85714	#REF!
					57.425	0.388889	0	0.388889	#DIV/0!	#REF!					1.165	0.428571	0.030303	0.398268	14.1429	#REF!
					57.53	0.37963	0	0.37963	#DIV/0!	#REF!					0.075	1	0.606061	0.393939	1.65	#REF!
					57.775	0.37037	0	0.37037	#DIV/0!	#REF!					1.6	0.380952	0	0.380952	#DIV/0!	#REF!
					60.27	0.361111	0	0.361111	#DIV/0!	#REF!					0.965	0.428571	0.0606061	0.367965	7.07143	#REF!
					10.5	0.935185	0.575758	0.359428	1.62427	#REF!					2.3	0.333333	0	0.333333	#DIV/0!	#REF!
					62.825	0.351852	0	0.351852	#DIV/0!	#REF!					0.065	1	0.666667	0.333333	1.5	#REF!
					63.135	0.342593	0	0.342593	#DIV/0!	#REF!					3.25	0.285714	0	0.285714	#DIV/0!	#REF!
					63.4	0.333333	0	0.333333	#DIV/0!	#REF!					4	0.238095	0	0.238095	#DIV/0!	#REF!
					10.36	0.935185	0.606061	0.329125	1.54306	#REF!					0.055	1	0.787879	0.212121	1.26923	#REF!
					63.75	0.324074	0	0.324074	#DIV/0!	#REF!					4.5	0.190476	0	0.190476	#DIV/0!	#REF!
					64.515	0.314815	0	0.314815	#DIV/0!	#REF!					0.035	1	0.848485	0.151515	1.17857	#REF!
					65.28	0.305556	0	0.305556	#DIV/0!	#REF!					5.48	0.142857	0	0.142857	#DIV/0!	#REF!
					10.31	0.935185	0.636364	0.298822	1.46958	#REF!					6.585	0.0952381	0	0.0952381	#DIV/0!	#REF!
					67.74	0.296296	0	0.296296	#DIV/0!	#REF!					12.555	0.047619	0	0.047619	#DIV/0!	#REF!
					70.715	0.287037	0	0.287037	#DIV/0!	#REF!					19.3	0	0	0	#DIV/0!	#REF!
					8.895	0.953704	0.666667	0.287037	1.43056	#REF!				Leukocyte	0.21	1	1	0	1	#REF!
					71.565	0.277778	0	0.277778	#DIV/0!	#REF!					5.265	0.904762	0.333333	0.571429	2.71429	#REF!
					9.45	0.944444	0.666667	0.277778	1.41667	#REF!					5.13	0.904762	0.363636	0.541126	2.4881	#REF!
					73.685	0.268519	0	0.268519	#DIV/0!	#REF!					5.44	0.857143	0.333333	0.52381	2.57143	#REF!
					9.935	0.935185	0.666667	0.268519	1.40278	#REF!					4.965	0.904762	0.393939	0.510823	2.2967	#REF!
					76.805	0.259259	0	0.259259	#DIV/0!	#REF!					4.35	0.952381	0.454545	0.497835	2.09524	#REF!
					8.41	0.953704	0.69697	0.256734	1.36836	#REF!					4.815	0.904762	0.424242	0.480519	2.13265	#REF!
					78.345	0.25	0	0.25	#DIV/0!	#REF!					5.63	0.809524	0.333333	0.47619	2.42857	#REF!
					78.85	0.240741	0	0.240741	#DIV/0!	#REF!					10.295	0.47619	0	0.47619	#DIV/0!	#REF!
					80.435	0.231481	0	0.231481	#DIV/0!	#REF!					4.105	0.952381	0.484848	0.467532	1.96429	#REF!
					8.275	0.953704	0.727273	0.226431	1.31134	#REF!					4.58	0.904762	0.454545	0.450216	1.99048	#REF!
					85.57	0.222222	0	0.222222	#DIV/0!	#REF!					9.63	0.47619	0.030303	0.445887	15.7143	#REF!
					89.41	0.212963	0	0.212963	#DIV/0!	#REF!					3.88	0.952381	0.515152	0.437229	1.84874	#REF!
					7.895	0.962963	0.757576	0.205387	1.27111	#REF!					9.255	0.52381	0.0909091	0.4329	5.7619	#REF!
					91.57	0.203704	0	0.203704	#DIV/0!	#REF!					11.005	0.428571	0	0.428571	#DIV/0!	#REF!
					8.075	0.953704	0.757576	0.196128	1.25889	#REF!					5.775	0.761905	0.333333	0.428571	2.28571	#REF!
					96.045	0.194444	0	0.194444	#DIV/0!	#REF!					3.545	1	0.575758	0.424242	1.73684	#REF!
					100.015	0.185185	0	0.185185	#DIV/0!	#REF!					7.565	0.666667	0.242424	0.424242	2.75	#REF!
					103.995	0.175926	0	0.175926	#DIV/0!	#REF!					9.555	0.47619	0.0606061	0.415584	7.85714	#REF!
					7.67	0.962963	0.787879	0.175084	1.22222	#REF!					3.83	0.952381	0.545455	0.406926	1.74603	#REF!
					6.365	0.990741	0.818182	0.172559	1.21091	#REF!					7.99	0.619048	0.212121	0.406926	2.91837	#REF!
					109.525	0.166667	0	0.166667	#DIV/0!	#REF!					9.06	0.52381	0.121212	0.402597	4.32143	#REF!
					6.8	0.981481	0.818182	0.1633	1.19959	#REF!					3.195	1	0.606061	0.393939	1.65	#REF!
					112.71	0.157407	0	0.157407	#DIV/0!	#REF!					7.325	0.666667	0.272727	0.393939	2.44444	#REF!
					7.17	0.972222	0.818182	0.15404	1.18827	#REF!					9.465	0.47619	0.0909091	0.385281	5.2381	#REF!
					115.07	0.148148	0	0.148148	#DIV/0!	#REF!					6.065	0.714286	0.333333	0.380952	2.14286	#REF!
					7.435	0.962963	0.818182	0.144781	1.17695	#REF!					11.315	0.380952	0	0.380952	#DIV/0!	#REF!
					6.005	0.990741	0.848485	0.142256	1.16766	#REF!					3.76	0.952381	0.575758	0.376623	1.65414	#REF!
					118.705	0.138889	0	0.138889	#DIV/0!	#REF!					7.87	0.619048	0.242424	0.376623	2.55357	#REF!
					120.23	0.12963	0	0.12963	#DIV/0!	#REF!					8.975	0.52381	0.151515	0.372294	3.45714	#REF!
					122.105	0.12037	0	0.12037	#DIV/0!	#REF!					2.77	1	0.636364	0.363636	1.57143	#REF!
					130.64	0.111111	0	0.111111	#DIV/0!	#REF!					7.015	0.666667	0.30303	0.363636	2.2	#REF!
					138.735	0.101852	0	0.101852	#DIV/0!	#REF!					8.28	0.571429	0.212121	0.359307	2.69388	#REF!
					141.73	0.0925926	0	0.0925926	#DIV/0!	#REF!					8.745	0.52381	0.181818	0.341991	2.88095	#REF!
					145.635	0.0833333	0	0.0833333	#DIV/0!	#REF!					11.665	0.333333	0	0.333333	#DIV/0!	#REF!
					158.895	0.0740741	0	0.0740741	#DIV/0!	#REF!					2.39	1	0.666667	0.333333	1.5	#REF!
					173.67	0.0648148	0	0.0648148	#DIV/0!	#REF!					6.51	0.666667	0.333333	0.333333	2	#REF!
					188.715	0.0555556	0	0.0555556	#DIV/0!	#REF!					8.525	0.52381	0.212121	0.311688	2.46939	#REF!
					201	0	0	0	#DIV/0!	#REF!					13	0.285714	0	0.285714	#DIV/0!	#REF!
				PCT	-0.98	1	1	0	1	#REF!					2.23	1	0.727273	0.272727	1.375	#REF!
					0.195	0.990741	0.363636	0.627104	2.72454	#REF!					2.13	1	0.757576	0.242424	1.32	#REF!
					0.67	0.685185	0.0606061	0.624579	11.3056	#REF!					14.62	0.238095	0	0.238095	#DIV/0!	#REF!
					0.725	0.675926	0.0606061	0.61532	11.1528	#REF!					2.03	1	0.787879	0.212121	1.26923	#REF!
					0.48	0.796296	0.181818	0.614478	4.37963	#REF!					15.235	0.190476	0	0.190476	#DIV/0!	#REF!
					0.625	0.703704	0.0909091	0.612795	7.74074	#REF!					1.815	1	0.818182	0.181818	1.22222	#REF!
					0.575	0.731481	0.121212	0.610269	6.03472	#REF!					1.6	1	0.848485	0.151515	1.17857	#REF!
					0.775	0.666667	0.0606061	0.606061	11	#REF!					18.68	0.142857	0	0.142857	#DIV/0!	#REF!
					0.635	0.685185	0.0909091	0.594276	7.53704	#REF!					1.54	1	0.878788	0.121212	1.13793	#REF!
					0.455	0.796296	0.212121	0.584175	3.75397	#REF!					22.105	0.0952381	0	0.0952381	#DIV/0!	#REF!
					0.61	0.703704	0.121212	0.582492	5.80556	#REF!					1.495	1	0.909091	0.0909091	1.1	#REF!
					0.54	0.731481	0.151515	0.579966	4.82778	#REF!					1.375	1	0.939394	0.0606061	1.06452	#REF!
					0.185	0.990741	0.424242	0.566498	2.33532	#REF!					25.465	0.047619	0	0.047619	#DIV/0!	#REF!
					0.385	0.833333	0.272727	0.560606	3.05556	#REF!					1.245	1	0.969697	0.030303	1.03125	#REF!
					0.825	0.62037	0.0606061	0.559764	10.2361	#REF!					29.67	0	0	0	#DIV/0!	#REF!
					0.426	0.796296	0.242424	0.553872	3.28472	#REF!				Neutrophils	0.1	1	1	0	1	#REF!
					0.875	0.611111	0.0606061	0.550505	10.0833	#REF!					3.85	0.952381	0.393939	0.558442	2.41758	#REF!
					0.515	0.731481	0.181818	0.549663	4.02315	#REF!					4	0.904762	0.363636	0.541126	2.4881	#REF!
					0.175	0.990741	0.454545	0.536195	2.17963	#REF!					3.65	0.952381	0.424242	0.528139	2.2449	#REF!
					0.36	0.833333	0.30303	0.530303	2.75	#REF!					3.1	0.952381	0.454545	0.497835	2.09524	#REF!
					0.401	0.796296	0.272727	0.523569	2.91975	#REF!					8.55	0.52381	0.030303	0.493506	17.2857	#REF!
					0.25	0.87963	0.363636	0.515993	2.41898	#REF!					2.35	1	0.515152	0.484848	1.94118	#REF!
					0.935	0.574074	0.0606061	0.513468	9.47222	#REF!					2.65	0.952381	0.484848	0.467532	1.96429	#REF!
					0.985	0.564815	0.0606061	0.504209	9.31944	#REF!					8.35	0.52381	0.0606061	0.463203	8.64286	#REF!
					0.335	0.833333	0.333333	0.5	2.5	#REF!					2.1	1	0.545455	0.454545	1.83333	#REF!
					0.31	0.833333	0.363636	0.469697	2.29167	#REF!					4.15	0.809524	0.363636	0.445887	2.22619	#REF!
					0.135	0.990741	0.545455	0.445286	1.81636	#REF!					2.55	0.952381	0.515152	0.437229	1.84874	#REF!
					1.05	0.472222	0.030303	0.441919	15.5833	#REF!					7.75	0.52381	0.0909091	0.4329	5.7619	#REF!
					1.085	0.462963	0.030303	0.43266	15.2778	#REF!					8.75	0.428571	0	0.428571	#DIV/0!	#REF!
					0.09	0.990741	0.575758	0.414983	1.72076	#REF!					4.6	0.761905	0.333333	0.428571	2.28571	#REF!
					1.125	0.444444	0.030303	0.414141	14.6667	#REF!					1.95	1	0.575758	0.424242	1.73684	#REF!
					1.015	0.472222	0.0606061	0.411616	7.79167	#REF!					4.35	0.761905	0.363636	0.398268	2.09524	#REF!
					1.17	0.435185	0.030303	0.404882	14.3611	#REF!					1.85	1	0.606061	0.393939	1.65	#REF!
					1.325	0.398148	0	0.398148	#DIV/0!	#REF!					9	0.380952	0	0.380952	#DIV/0!	#REF!
					1.195	0.425926	0.030303	0.395623	14.0556	#REF!					6.25	0.571429	0.212121	0.359307	2.69388	#REF!
					1.375	0.388889	0	0.388889	#DIV/0!	#REF!					7.05	0.52381	0.181818	0.341991	2.88095	#REF!
					0.075	0.990741	0.606061	0.38468	1.63472	#REF!					9.35	0.333333	0	0.333333	#DIV/0!	#REF!
					1.25	0.407407	0.030303	0.377104	13.4444	#REF!					1.7	1	0.666667	0.333333	1.5	#REF!
					1.5	0.361111	0	0.361111	#DIV/0!	#REF!					4.85	0.666667	0.333333	0.333333	2	#REF!
					1.65	0.351852	0	0.351852	#DIV/0!	#REF!					6.6	0.52381	0.212121	0.311688	2.46939	#REF!
					1.725	0.333333	0	0.333333	#DIV/0!	#REF!					5.85	0.571429	0.272727	0.298701	2.09524	#REF!
					1.76	0.324074	0	0.324074	#DIV/0!	#REF!					5.2	0.619048	0.333333	0.285714	1.85714	#REF!
					0.065	0.990741	0.666667	0.324074	1.48611	#REF!					10.5	0.285714	0	0.285714	#DIV/0!	#REF!
					1.785	0.314815	0	0.314815	#DIV/0!	#REF!					5.55	0.571429	0.30303	0.268398	1.88571	#REF!
					1.845	0.305556	0	0.305556	#DIV/0!	#REF!					1.55	1	0.757576	0.242424	1.32	#REF!
					1.895	0.296296	0	0.296296	#DIV/0!	#REF!					12.1	0.238095	0	0.238095	#DIV/0!	#REF!
					1.95	0.287037	0	0.287037	#DIV/0!	#REF!					5.45	0.571429	0.333333	0.238095	1.71429	#REF!
					2.065	0.268519	0	0.268519	#DIV/0!	#REF!					1.45	1	0.787879	0.212121	1.26923	#REF!
					2.215	0.259259	0	0.259259	#DIV/0!	#REF!					13.1	0.190476	0	0.190476	#DIV/0!	#REF!
					2.4	0.25	0	0.25	#DIV/0!	#REF!					1.35	1	0.818182	0.181818	1.22222	#REF!
					2.51	0.240741	0	0.240741	#DIV/0!	#REF!					16.05	0.142857	0	0.142857	#DIV/0!	#REF!
					2.55	0.231481	0	0.231481	#DIV/0!	#REF!					18.85	0.0952381	0	0.0952381	#DIV/0!	#REF!
					2.66	0.222222	0	0.222222	#DIV/0!	#REF!					1.25	1	0.909091	0.0909091	1.1	#REF!
					2.815	0.212963	0	0.212963	#DIV/0!	#REF!					1.15	1	0.939394	0.0606061	1.06452	#REF!
					2.895	0.203704	0	0.203704	#DIV/0!	#REF!					23.6	0.047619	0	0.047619	#DIV/0!	#REF!
					0.055	0.990741	0.787879	0.202862	1.25748	#REF!					29.2	0	0	0	#DIV/0!	#REF!
					2.94	0.194444	0	0.194444	#DIV/0!	#REF!
					3.06	0.185185	0	0.185185	#DIV/0!	#REF!
					3.175	0.175926	0	0.175926	#DIV/0!	#REF!
					3.255	0.166667	0	0.166667	#DIV/0!	#REF!
					3.325	0.157407	0	0.157407	#DIV/0!	#REF!
					3.36	0.148148	0	0.148148	#DIV/0!	#REF!
					0.035	0.990741	0.848485	0.142256	1.16766	#REF!
					3.385	0.138889	0	0.138889	#DIV/0!	#REF!
					3.45	0.12037	0	0.12037	#DIV/0!	#REF!
					3.67	0.111111	0	0.111111	#DIV/0!	#REF!
					4.02	0.101852	0	0.101852	#DIV/0!	#REF!
					4.235	0.0925926	0	0.0925926	#DIV/0!	#REF!
					4.385	0.0833333	0	0.0833333	#DIV/0!	#REF!
					4.75	0.0740741	0	0.0740741	#DIV/0!	#REF!
					5.2	0.0648148	0	0.0648148	#DIV/0!	#REF!
					5.55	0.0462963	0	0.0462963	#DIV/0!	#REF!
					6.055	0.037037	0	0.037037	#DIV/0!	#REF!
					6.42	0.0277778	0	0.0277778	#DIV/0!	#REF!
					7.665	0.0185185	0	0.0185185	#DIV/0!	#REF!
					11.695	0.00925926	0	0.00925926	#DIV/0!	#REF!
					15.49	0	0	0	#DIV/0!	#REF!
				Leukocyte	0.21	1	1	0	1	#REF!
					5.195	0.898148	0.333333	0.564815	2.69444	#REF!
					5.225	0.888889	0.333333	0.555556	2.66667	#REF!
					5.25	0.87963	0.333333	0.546296	2.63889	#REF!
					5.085	0.907407	0.363636	0.543771	2.49537	#REF!
					5.275	0.87037	0.333333	0.537037	2.61111	#REF!
					5.135	0.898148	0.363636	0.534512	2.46991	#REF!
					5.44	0.861111	0.333333	0.527778	2.58333	#REF!
					5.595	0.851852	0.333333	0.518519	2.55556	#REF!
					4.965	0.907407	0.393939	0.513468	2.30342	#REF!
					5.61	0.842593	0.333333	0.509259	2.52778	#REF!
					5.635	0.833333	0.333333	0.5	2.5	#REF!
					4.805	0.916667	0.424242	0.492424	2.16071	#REF!
					5.68	0.824074	0.333333	0.490741	2.47222	#REF!
					4.42	0.944444	0.454545	0.489899	2.07778	#REF!
					4.84	0.907407	0.424242	0.483165	2.13889	#REF!
					5.745	0.814815	0.333333	0.481481	2.44444	#REF!
					4.535	0.935185	0.454545	0.48064	2.05741	#REF!
					5.89	0.805556	0.333333	0.472222	2.41667	#REF!
					4.045	0.953704	0.484848	0.468855	1.96701	#REF!
					6.05	0.796296	0.333333	0.462963	2.38889	#REF!
					4.665	0.916667	0.454545	0.462121	2.01667	#REF!
					4.26	0.944444	0.484848	0.459596	1.94792	#REF!
					6.24	0.787037	0.333333	0.453704	2.36111	#REF!
					9.75	0.453704	0	0.453704	#DIV/0!	#REF!
					7.35	0.694444	0.242424	0.45202	2.86458	#REF!
					9.885	0.444444	0	0.444444	#DIV/0!	#REF!
					7.425	0.685185	0.242424	0.442761	2.82639	#REF!
					3.88	0.953704	0.515152	0.438552	1.85131	#REF!
					10.03	0.435185	0	0.435185	#DIV/0!	#REF!
					6.385	0.768519	0.333333	0.435185	2.30556	#REF!
					6.74	0.731481	0.30303	0.428451	2.41389	#REF!
					6.41	0.759259	0.333333	0.425926	2.27778	#REF!
					10.105	0.425926	0	0.425926	#DIV/0!	#REF!
					7.53	0.666667	0.242424	0.424242	2.75	#REF!
					9.63	0.453704	0.030303	0.423401	14.9722	#REF!
					7.325	0.694444	0.272727	0.421717	2.5463	#REF!
					6.785	0.722222	0.30303	0.419192	2.38333	#REF!
					6.465	0.75	0.333333	0.416667	2.25	#REF!
					7.585	0.657407	0.242424	0.414983	2.71181	#REF!
					7.02	0.712963	0.30303	0.409933	2.35278	#REF!
					3.83	0.953704	0.545455	0.408249	1.74846	#REF!
					10.335	0.407407	0	0.407407	#DIV/0!	#REF!
					6.505	0.740741	0.333333	0.407407	2.22222	#REF!
					7.595	0.648148	0.242424	0.405724	2.67361	#REF!
					7.275	0.703704	0.30303	0.400673	2.32222	#REF!
					8.005	0.611111	0.212121	0.39899	2.88095	#REF!
					6.61	0.731481	0.333333	0.398148	2.19444	#REF!
					10.57	0.398148	0	0.398148	#DIV/0!	#REF!
					7.62	0.638889	0.242424	0.396465	2.63542	#REF!
					9.555	0.453704	0.0606061	0.393098	7.48611	#REF!
					7.315	0.694444	0.30303	0.391414	2.29167	#REF!
					8.12	0.601852	0.212121	0.389731	2.8373	#REF!
					3.435	0.962963	0.575758	0.387205	1.67251	#REF!
					7.655	0.62963	0.242424	0.387205	2.59722	#REF!
					9.165	0.472222	0.0909091	0.381313	5.19444	#REF!
					8.225	0.592593	0.212121	0.380471	2.79365	#REF!
					10.6	0.37963	0	0.37963	#DIV/0!	#REF!
					9	0.5	0.121212	0.378788	4.125	#REF!
					3.65	0.953704	0.575758	0.377946	1.65643	#REF!
					7.805	0.62037	0.242424	0.377946	2.55903	#REF!
					3.125	0.981481	0.606061	0.375421	1.61944	#REF!
					8.56	0.555556	0.181818	0.373737	3.05556	#REF!
					9.32	0.462963	0.0909091	0.372054	5.09259	#REF!
					10.645	0.37037	0	0.37037	#DIV/0!	#REF!
					3.25	0.972222	0.606061	0.366162	1.60417	#REF!
					8.625	0.546296	0.181818	0.364478	3.00463	#REF!
					9.495	0.453704	0.0909091	0.362795	4.99074	#REF!
					8.3	0.574074	0.212121	0.361953	2.70635	#REF!
					10.84	0.361111	0	0.361111	#DIV/0!	#REF!
					9.03	0.481481	0.121212	0.360269	3.97222	#REF!
					3.32	0.962963	0.606061	0.356902	1.58889	#REF!
					8.7	0.537037	0.181818	0.355219	2.9537	#REF!
					8.425	0.564815	0.212121	0.352694	2.6627	#REF!
					11.05	0.351852	0	0.351852	#DIV/0!	#REF!
					9.09	0.472222	0.121212	0.35101	3.89583	#REF!
					8.975	0.5	0.151515	0.348485	3.3	#REF!
					8.81	0.527778	0.181818	0.34596	2.90278	#REF!
					2.77	0.981481	0.636364	0.345118	1.54233	#REF!
					8.905	0.518519	0.181818	0.3367	2.85185	#REF!
					11.285	0.333333	0	0.333333	#DIV/0!	#REF!
					8.945	0.509259	0.181818	0.327441	2.80093	#REF!
					11.53	0.324074	0	0.324074	#DIV/0!	#REF!
					2.345	0.990741	0.666667	0.324074	1.48611	#REF!
					11.615	0.314815	0	0.314815	#DIV/0!	#REF!
					2.465	0.981481	0.666667	0.314815	1.47222	#REF!
					11.815	0.296296	0	0.296296	#DIV/0!	#REF!
					12.04	0.287037	0	0.287037	#DIV/0!	#REF!
					12.25	0.277778	0	0.277778	#DIV/0!	#REF!
					12.465	0.268519	0	0.268519	#DIV/0!	#REF!
					2.23	0.990741	0.727273	0.263468	1.36227	#REF!
					12.6	0.259259	0	0.259259	#DIV/0!	#REF!
					13.055	0.25	0	0.25	#DIV/0!	#REF!
					13.48	0.240741	0	0.240741	#DIV/0!	#REF!
					2.13	0.990741	0.757576	0.233165	1.30778	#REF!
					13.66	0.231481	0	0.231481	#DIV/0!	#REF!
					14.035	0.222222	0	0.222222	#DIV/0!	#REF!
					14.555	0.212963	0	0.212963	#DIV/0!	#REF!
					1.995	1	0.787879	0.212121	1.26923	#REF!
					15.055	0.203704	0	0.203704	#DIV/0!	#REF!
					2.035	0.990741	0.787879	0.202862	1.25748	#REF!
					15.405	0.194444	0	0.194444	#DIV/0!	#REF!
					15.545	0.185185	0	0.185185	#DIV/0!	#REF!
					1.815	1	0.818182	0.181818	1.22222	#REF!
					15.6	0.175926	0	0.175926	#DIV/0!	#REF!
					15.655	0.166667	0	0.166667	#DIV/0!	#REF!
					15.685	0.157407	0	0.157407	#DIV/0!	#REF!
					1.6	1	0.848485	0.151515	1.17857	#REF!
					15.725	0.148148	0	0.148148	#DIV/0!	#REF!
					15.825	0.138889	0	0.138889	#DIV/0!	#REF!
					16.205	0.12963	0	0.12963	#DIV/0!	#REF!
					1.54	1	0.878788	0.121212	1.13793	#REF!
					16.815	0.12037	0	0.12037	#DIV/0!	#REF!
					17.51	0.111111	0	0.111111	#DIV/0!	#REF!
					17.93	0.101852	0	0.101852	#DIV/0!	#REF!
					18.015	0.0925926	0	0.0925926	#DIV/0!	#REF!
					1.495	1	0.909091	0.0909091	1.1	#REF!
					18.31	0.0740741	0	0.0740741	#DIV/0!	#REF!
					18.61	0.0648148	0	0.0648148	#DIV/0!	#REF!
					1.375	1	0.939394	0.0606061	1.06452	#REF!
					18.995	0.0555556	0	0.0555556	#DIV/0!	#REF!
					19.38	0.0462963	0	0.0462963	#DIV/0!	#REF!
					19.6	0.037037	0	0.037037	#DIV/0!	#REF!
					1.245	1	0.969697	0.030303	1.03125	#REF!
					19.855	0.0277778	0	0.0277778	#DIV/0!	#REF!
					20.085	0.0185185	0	0.0185185	#DIV/0!	#REF!
					21.995	0.00925926	0	0.00925926	#DIV/0!	#REF!
					24.77	0	0	0	#DIV/0!	#REF!
				Neutrophils	0.1	1	1	0	1	#REF!
					4	0.87963	0.363636	0.515993	2.41898	#REF!
					2.75	0.944444	0.454545	0.489899	2.07778	#REF!
					3.85	0.87963	0.393939	0.48569	2.23291	#REF!
					4.2	0.842593	0.363636	0.478956	2.31713	#REF!
					3.05	0.925926	0.454545	0.47138	2.03704	#REF!
					3.65	0.888889	0.424242	0.464646	2.09524	#REF!
					4.6	0.796296	0.333333	0.462963	2.38889	#REF!
					3.35	0.916667	0.454545	0.462121	2.01667	#REF!
					4.35	0.824074	0.363636	0.460438	2.2662	#REF!
					2.65	0.944444	0.484848	0.459596	1.94792	#REF!
					3.45	0.907407	0.454545	0.452862	1.9963	#REF!
					4.45	0.814815	0.363636	0.451178	2.24074	#REF!
					2.25	0.962963	0.515152	0.447811	1.86928	#REF!
					2.4	0.953704	0.515152	0.438552	1.85131	#REF!
					4.75	0.768519	0.333333	0.435185	2.30556	#REF!
					2.55	0.944444	0.515152	0.429293	1.83333	#REF!
					4.85	0.759259	0.333333	0.425926	2.27778	#REF!
					2.1	0.962963	0.545455	0.417508	1.76543	#REF!
					4.95	0.740741	0.333333	0.407407	2.22222	#REF!
					1.95	0.972222	0.575758	0.396465	1.6886	#REF!
					6.2	0.601852	0.212121	0.389731	2.8373	#REF!
					5.1	0.722222	0.333333	0.388889	2.16667	#REF!
					6.35	0.592593	0.212121	0.380471	2.79365	#REF!
					5.7	0.648148	0.272727	0.375421	2.37654	#REF!
					5.25	0.703704	0.333333	0.37037	2.11111	#REF!
					1.85	0.972222	0.606061	0.366162	1.60417	#REF!
					5.55	0.666667	0.30303	0.363636	2.2	#REF!
					7.35	0.453704	0.0909091	0.362795	4.99074	#REF!
					6.45	0.574074	0.212121	0.361953	2.70635	#REF!
					5.9	0.62963	0.272727	0.356902	2.30864	#REF!
					6.55	0.564815	0.212121	0.352694	2.6627	#REF!
					5.35	0.685185	0.333333	0.351852	2.05556	#REF!
					6.05	0.62037	0.272727	0.347643	2.27469	#REF!
					7.55	0.435185	0.0909091	0.344276	4.78704	#REF!
					6.65	0.555556	0.212121	0.343434	2.61905	#REF!
					8.65	0.342593	0	0.342593	#DIV/0!	#REF!
					6.85	0.518519	0.181818	0.3367	2.85185	#REF!
					7.75	0.425926	0.0909091	0.335017	4.68519	#REF!
					8.8	0.333333	0	0.333333	#DIV/0!	#REF!
					5.45	0.666667	0.333333	0.333333	2	#REF!
					7.9	0.416667	0.0909091	0.325758	4.58333	#REF!
					8.95	0.324074	0	0.324074	#DIV/0!	#REF!
					6.75	0.527778	0.212121	0.315657	2.4881	#REF!
					9.4	0.314815	0	0.314815	#DIV/0!	#REF!
					1.65	0.981481	0.666667	0.314815	1.47222	#REF!
					8.55	0.342593	0.030303	0.31229	11.3056	#REF!
					7	0.490741	0.181818	0.308923	2.69907	#REF!
					10	0.305556	0	0.305556	#DIV/0!	#REF!
					1.75	0.972222	0.666667	0.305556	1.45833	#REF!
					8.25	0.361111	0.0606061	0.300505	5.95833	#REF!
					7.15	0.481481	0.181818	0.299663	2.64815	#REF!
					8.05	0.388889	0.0909091	0.29798	4.27778	#REF!
					10.3	0.296296	0	0.296296	#DIV/0!	#REF!
					8.35	0.351852	0.0606061	0.291246	5.80556	#REF!
					8.15	0.37963	0.0909091	0.288721	4.17593	#REF!
					8.45	0.342593	0.0606061	0.281987	5.65278	#REF!
					7.25	0.462963	0.181818	0.281145	2.5463	#REF!
					10.5	0.277778	0	0.277778	#DIV/0!	#REF!
					10.65	0.259259	0	0.259259	#DIV/0!	#REF!
					11	0.25	0	0.25	#DIV/0!	#REF!
					11.5	0.240741	0	0.240741	#DIV/0!	#REF!
					1.55	0.990741	0.757576	0.233165	1.30778	#REF!
					11.95	0.231481	0	0.231481	#DIV/0!	#REF!
					12.4	0.222222	0	0.222222	#DIV/0!	#REF!
					1.45	0.990741	0.787879	0.202862	1.25748	#REF!
					12.7	0.194444	0	0.194444	#DIV/0!	#REF!
					12.85	0.185185	0	0.185185	#DIV/0!	#REF!
					13	0.175926	0	0.175926	#DIV/0!	#REF!
					1.35	0.990741	0.818182	0.172559	1.21091	#REF!
					13.3	0.166667	0	0.166667	#DIV/0!	#REF!
					13.55	0.157407	0	0.157407	#DIV/0!	#REF!
					13.75	0.12963	0	0.12963	#DIV/0!	#REF!
					14.15	0.12037	0	0.12037	#DIV/0!	#REF!
					14.9	0.101852	0	0.101852	#DIV/0!	#REF!
					15.45	0.0925926	0	0.0925926	#DIV/0!	#REF!
					15.7	0.0833333	0	0.0833333	#DIV/0!	#REF!
					1.25	0.990741	0.909091	0.0816498	1.08981	#REF!
					16.05	0.0740741	0	0.0740741	#DIV/0!	#REF!
					16.45	0.0648148	0	0.0648148	#DIV/0!	#REF!
					1.15	1	0.939394	0.0606061	1.06452	#REF!
					16.95	0.0555556	0	0.0555556	#DIV/0!	#REF!
					17.35	0.0462963	0	0.0462963	#DIV/0!	#REF!
					18.15	0.0277778	0	0.0277778	#DIV/0!	#REF!
					18.85	0.0185185	0	0.0185185	#DIV/0!	#REF!
					20.1	0.00925926	0	0.00925926	#DIV/0!	#REF!
					22.3	0	0	0	#DIV/0!	#REF!

## Sheet: Sheet3
			Bacteria-virus		gold standard
				test	a	b
				c	95	12	0.88785	PPV
				d	13	21	0.617647	NPV
			Fungus-virus		gold standard
				test	a	b
				c	20	13	0.606061	PPV
				d	1	20	0.952381	NPV
